# Supplementary material for: Phylogeny and Evolution of Pharmacophagy in Tiger Moths (Lepidoptera: Erebidae: Arctiinae)
Source: PubMed Central journal article supplement (PMC4103773; doi:10.1371/journal.pone.0101975), 2014-07-18

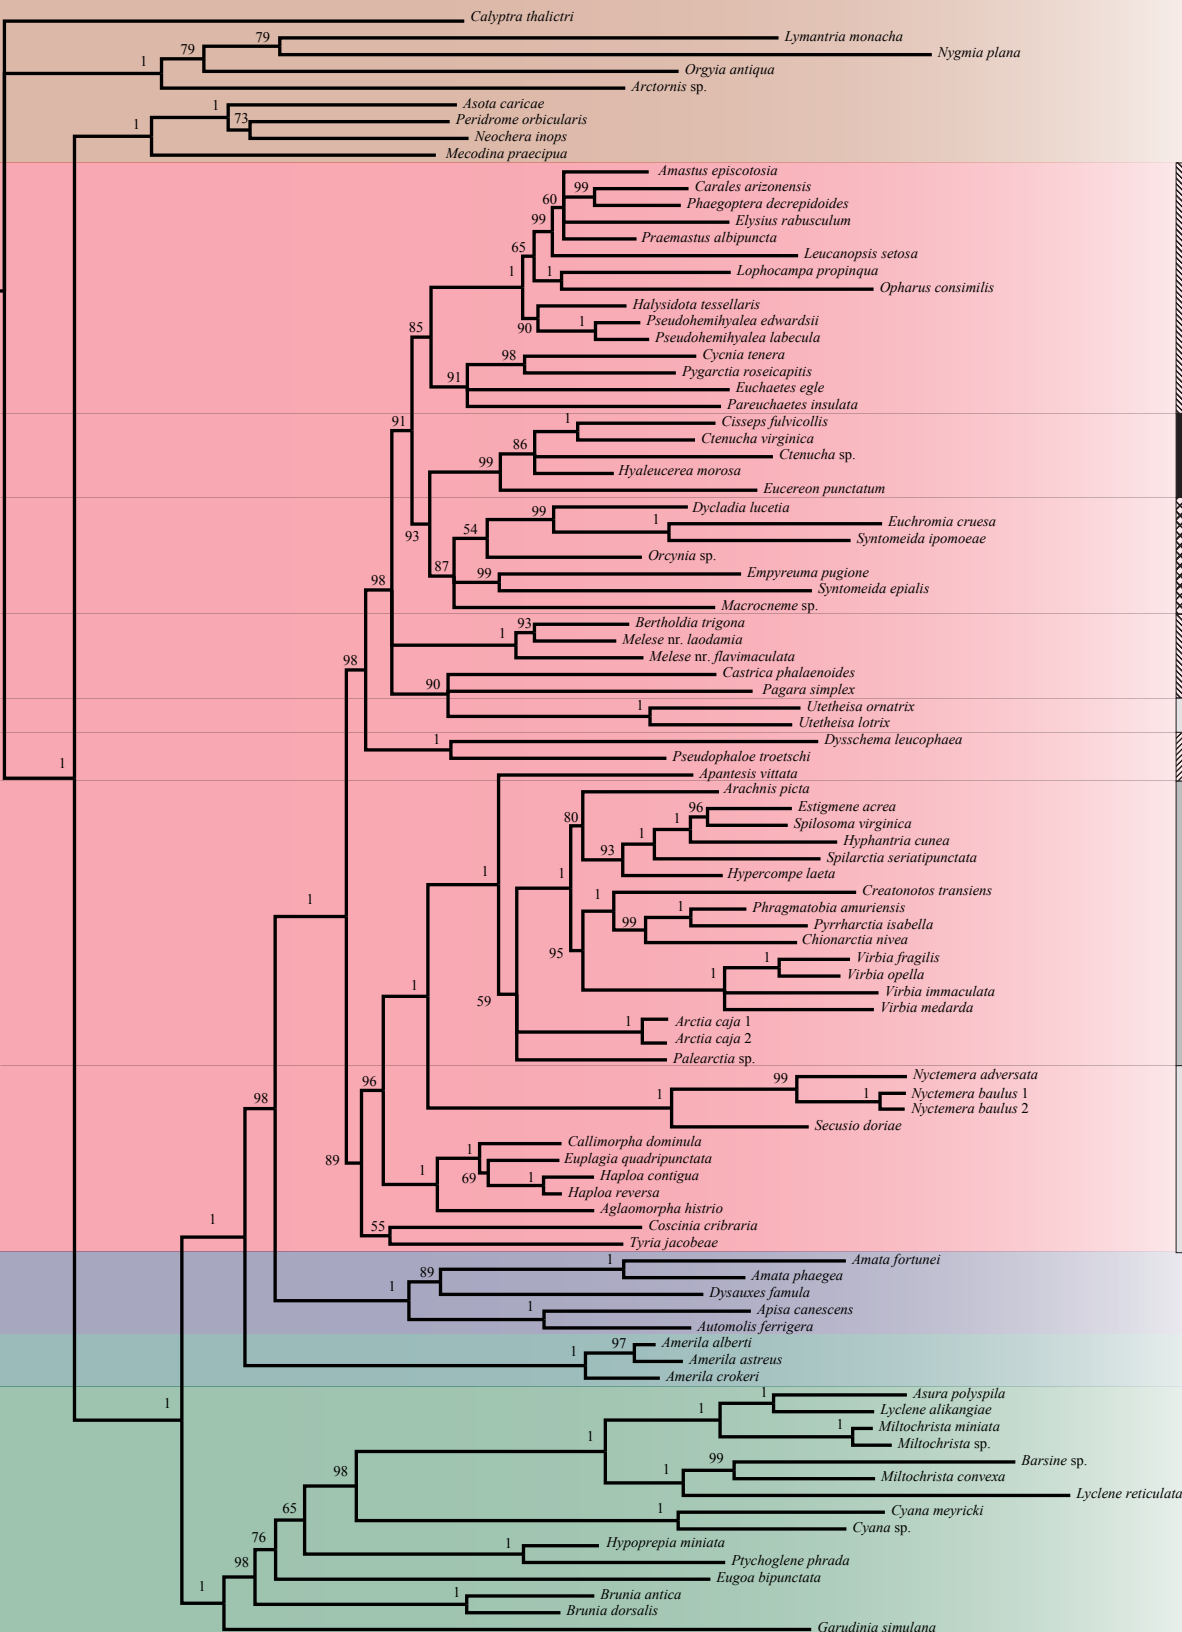

Supplement: pone.0101975.s001.pdf [file pone.0101975.s001.pdf]
